# Supplementary material for: Overexpression of MdZAT5, an C2H2-Type Zinc Finger Protein, Regulates Anthocyanin Accumulation and Salt Stress Response in Apple Calli and Arabidopsis
Source: MDPI journal article supplement (doi:10.3390/ijms23031897), 2022-02-08
Supplement: s1 [file s1]

**Supplementary Table S1:** Primers for quantitative real-time PCR.

| Primer name              | Sequences (5' to 3')                 |
|--------------------------|--------------------------------------|
| <i>MdZAT5</i> (PRI)      | F:GTCGACATGGAAGGCCAAGAAGAACTA        |
| <i>MdZAT5</i> (PRI)      | R:GGATCCATAATGACAATCCACCAAAGCAG<br>G |
| <i>MdZAT5</i> (qRT)      | F:TCATGATCAAGGGCAAGCGT               |
| <i>MdZAT5</i> (qRT)      | R:CCAATAGTACCAGCGCCACA               |
| <i>MdZAT5</i> (p1300-GN) | GTCGACGCCTACTTGATGTGGGCACTTA         |
| <i>MdZAT5</i> (p1300-GN) | GGATCCGCTCACAAACAAAAACCCAGAATT<br>TG |
| <i>MdANR</i> (qRT)       | F:TCAACAAAAGATACCCCCAG               |
| <i>MdANR</i> (qRT)       | R:GATAGCTAGCTCGATACATGC              |
| <i>MdDFR</i> (qRT)       | F:GTTGAGGGAGATAGGGTTTGAG             |
| <i>MdDFR</i> (qRT)       | R:GGTAAATGTAAAACAATAGAGAGG           |
| <i>MdUFGT</i> (qRT)      | F:GGAAGTGTTTGTGCGCCTG                |
| <i>MdUFGT</i> (qRT)      | R:CATTATTATTGAGCAACGAACAGC           |
| <i>MdF3H</i> (qRT)       | F:GCCGATCACCTACCCGAG                 |
| <i>MdF3H</i> (qRT)       | R:GTACAAGAAGTGGAAGGC                 |
| <i>MdCHI</i> (qRT)       | F:GCTACAAATGCGGTGATAG                |
| <i>MdCHI</i> (qRT)       | R:CGCCTCCACTACAACCTCC                |
| <i>MdCHS</i> (qRT)       | F:GGCAAGTGCTGTGGATT                  |
| <i>MdCHS</i> (qRT)       | R:CCCAAAGAAATAACCACAAG               |
| <i>AtNHX1</i> (qRT)      | F:TCTTGCTATTGGTGCCATAT               |
| <i>AtNHX1</i> (qRT)      | R:AGGTGTCTCGTCTTGATTC                |
| <i>AtABI1</i> (qRT)      | F:CCGTCTCACATCTTCGTGCTAAC            |
| <i>AtABI1</i> (qRT)      | R:CTTTCCCTCCTGCGGCTTCAATC            |
| 18S                      | F: ACACGGGGAGGTAGTGACAA              |
| 18S                      | R: CCTCCAATGGATCCTCGTTA              |
| <i>AtACTIN</i>           | F: TTTGGAGCCTGGGACTATGGAT            |
| <i>AtACTIN</i>           | R: ACGGGGGAATGGGATGAGAT              |
